# Supplementary material
Source: PubMed Central journal article supplement (PMC7450404)
Supplement: jamadermatol-e202571-s001.pdf [file jamadermatol-e202571-s001.pdf]

## Supplementary Online Content

Lukowiak TM, Aizman L, Perz A, et al. Association of age, sex, race, and geographic region with variation of the ratio of basal cell to cutaneous squamous cell carcinomas in the United States. *JAMA Dermatol*. Published online August 26, 2020.  
doi:10.1001/jamadermatol.2020.2571

**eTable 1.** Aggregate Optum CDM Demographic Data in Comparison With 2010 US Census Benchmarks

**eTable 2.** Odds Ratio for a KC to Be a BCC When Comparing Females With Males Within a Given Age Grouping

**eTable 3.** Mean BCC:cSCC Ratio by US Census Division

### eReferences

This supplementary material has been provided by the authors to give readers additional information about their work.

**eTable 1. Aggregate Optum CDM Demographic Data in Comparison With 2010 US Census Benchmarks<sup>1,2\*</sup>**

|                            | <b>Optum CDM</b> | <b>2010 U.S. Census Data</b> |
|----------------------------|------------------|------------------------------|
| Gender                     |                  |                              |
| Males                      | 49%              | 49%                          |
| Females                    | 51%              | 50%                          |
| US Region                  |                  |                              |
| Northeast                  | 10%              | 18%                          |
| Midwest                    | 23%              | 22%                          |
| South                      | 45%              | 37%                          |
| West                       | 22%              | 23%                          |
| Age Groups                 |                  |                              |
| 00-17                      | 22%              | 24%                          |
| 18-44                      | 41%              | 37%                          |
| 45-64                      | 23%              | 26%                          |
| 65+                        | 14%              | 13%                          |
| Ethnicity                  |                  |                              |
| White                      | 51%              | 63%                          |
| Black                      | 8%               | 13%                          |
| Hispanic                   | 10%              | 16%                          |
| Asian                      | 4%               | 5%                           |
| Other/Unknown              | 8%               | 3%                           |
| Race record does not exist | 19%              | 0%                           |

*\*Note: Optum CDM demographics are estimated based on coverage patterns from 2007 to 2018.*

**eTable 2. Odds Ratio for a KC to Be a BCC When Comparing Females With Males Within a Given Age Grouping**

| <i>Odds Ratio (95% CI)</i>      | <b>18-39</b>     | <b>40-64</b>     | <b>≥65</b>       |
|---------------------------------|------------------|------------------|------------------|
| <b>Females: Males</b>           | 1.67 (1.47-1.88) | 1.15 (1.12-1.19) | 0.98 (0.97-0.99) |
| <i>*all p-values &lt;0.0001</i> |                  |                  |                  |

*Note: The data represented in this table is based off the cases with complete information only and thereby excludes those of unknown race or census division*

**eTable 3. Mean BCC:cSCC Ratio by US Census Division**

| <b>Region</b>          | <b>Overall</b> | <b>Males</b> | <b>Females</b> |
|------------------------|----------------|--------------|----------------|
| <b>New England</b>     |                |              |                |
| 18-39                  | 10.92          | 8.75         | 12.79          |
| 40-64                  | 3.68           | 3.62         | 3.75           |
| ≥65                    | 1.55           | 1.61         | 1.47           |
| Total                  | 1.85           | 1.87         | 1.82           |
| <b>Middle Atlantic</b> |                |              |                |
| 18-39                  | 8.17           | 6.77         | 9.4            |
| 40-64                  | 3.41           | 3.33         | 3.52           |
| ≥65                    | 1.31           | 1.28         | 1.35           |
| Total                  | 1.65           | 1.59         | 1.76           |
| <b>South Atlantic</b>  |                |              |                |
| 18-39                  | 8.14           | 7.15         | 9.1            |
| 40-64                  | 2.27           | 2.08         | 2.58           |
| ≥65                    | 1.08           | 1.1          | 1.04           |
| Total                  | 1.35           | 1.31         | 1.42           |
| <b>E.N. Central</b>    |                |              |                |
| 18-39                  | 9.66           | 4.65         | 20.19          |
| 40-64                  | 3.87           | 3.54         | 4.32           |
| ≥65                    | 1.59           | 1.57         | 1.64           |
| Total                  | 2.04           | 1.92         | 2.25           |
| <b>E.S. Central</b>    |                |              |                |
| 18-39                  | 6.7            | 4.85         | 9.18           |
| 40-64                  | 2.51           | 2.34         | 2.78           |
| ≥65                    | 1.17           | 1.15         | 1.2            |
| Total                  | 1.5            | 1.42         | 1.63           |
| <b>W.N. Central</b>    |                |              |                |
| 18-39                  | 13.72          | 9.38         | 17.8           |
| 40-64                  | 3.75           | 3.56         | 3.96           |
| ≥65                    | 1.71           | 1.69         | 1.77           |
| Total                  | 2.12           | 2            | 2.32           |
| <b>W.S. Central</b>    |                |              |                |
| 18-39                  | 10.04          | 7.6          | 13.14          |
| 40-64                  | 2.91           | 2.8          | 3.11           |
| ≥65                    | 1.38           | 1.36         | 1.43           |
| Total                  | 2.01           | 1.89         | 2.28           |
| <b>Mountain</b>        |                |              |                |
| 18-39                  | 10.95          | 8.26         | 14.41          |
| 40-64                  | 3.21           | 3.18         | 3.24           |
| ≥65                    | 1.47           | 1.51         | 1.41           |
| Total                  | 1.83           | 1.82         | 1.85           |
| <b>Pacific</b>         |                |              |                |
| 18-39                  | 10.04          | 8.35         | 11.78          |
| 40-64                  | 3.26           | 3.25         | 3.27           |
| ≥65                    | 1.46           | 1.53         | 1.36           |
| Total                  | 1.87           | 1.9          | 1.82           |

*Note: The data represented in this table are based on all cases, excluding only those of unknown division*

## eReferences

1. *Clininformatics Data Mart 7.2* [Power point slide deck]. University of Pennsylvania Optum; 2020.
2. Howden LM, Meyer JA. Age and Sex Composition: 2010. In: Bureau USC, ed2011.
